# Supplementary material
Source: publisher figshare collection journal article supplement (https://karger.figshare.com/ndownloader/files/12843689)

**A**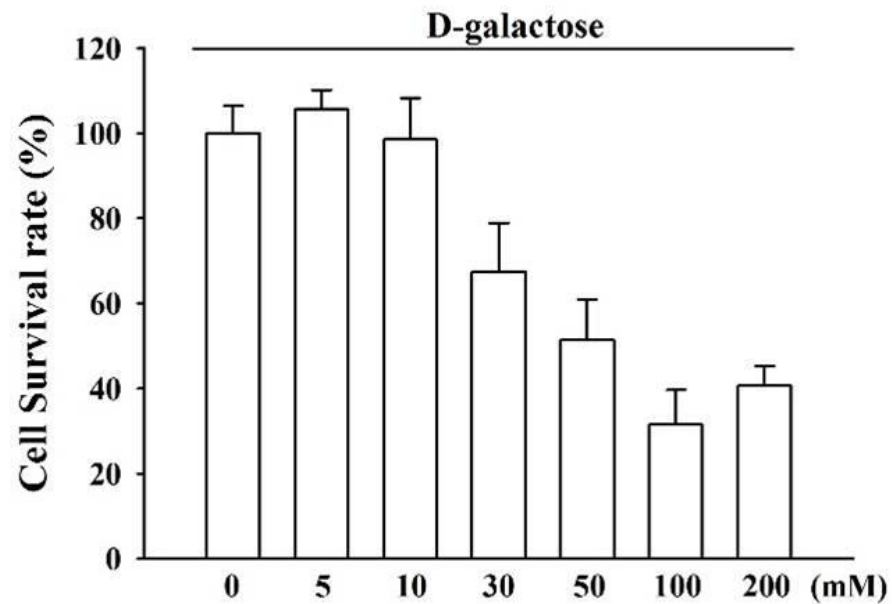**B**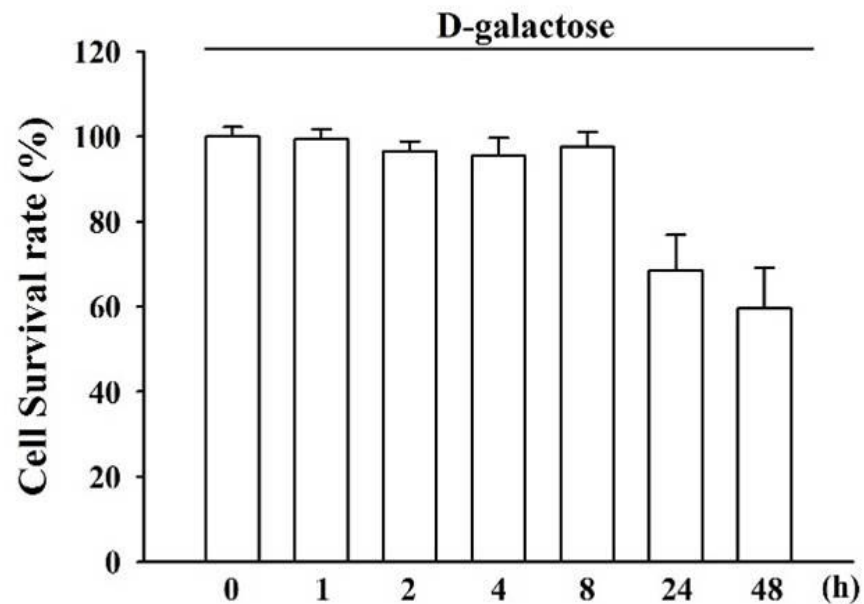

Supplement: Supplementary file 1 [file 12843689]
